# Supplementary material for: TFA als persistentes Abbauprodukt fluorierter Kohlenwasserstoffe
Source: publisher site journal article supplement (doi:10.1515/pubhef-2022-0077), 2022-11-30
Supplement: Supplementary file 1 [file pubhef-2022-0077_suppl.docx]

**Zusätzliche Informationen (Supplemente)**


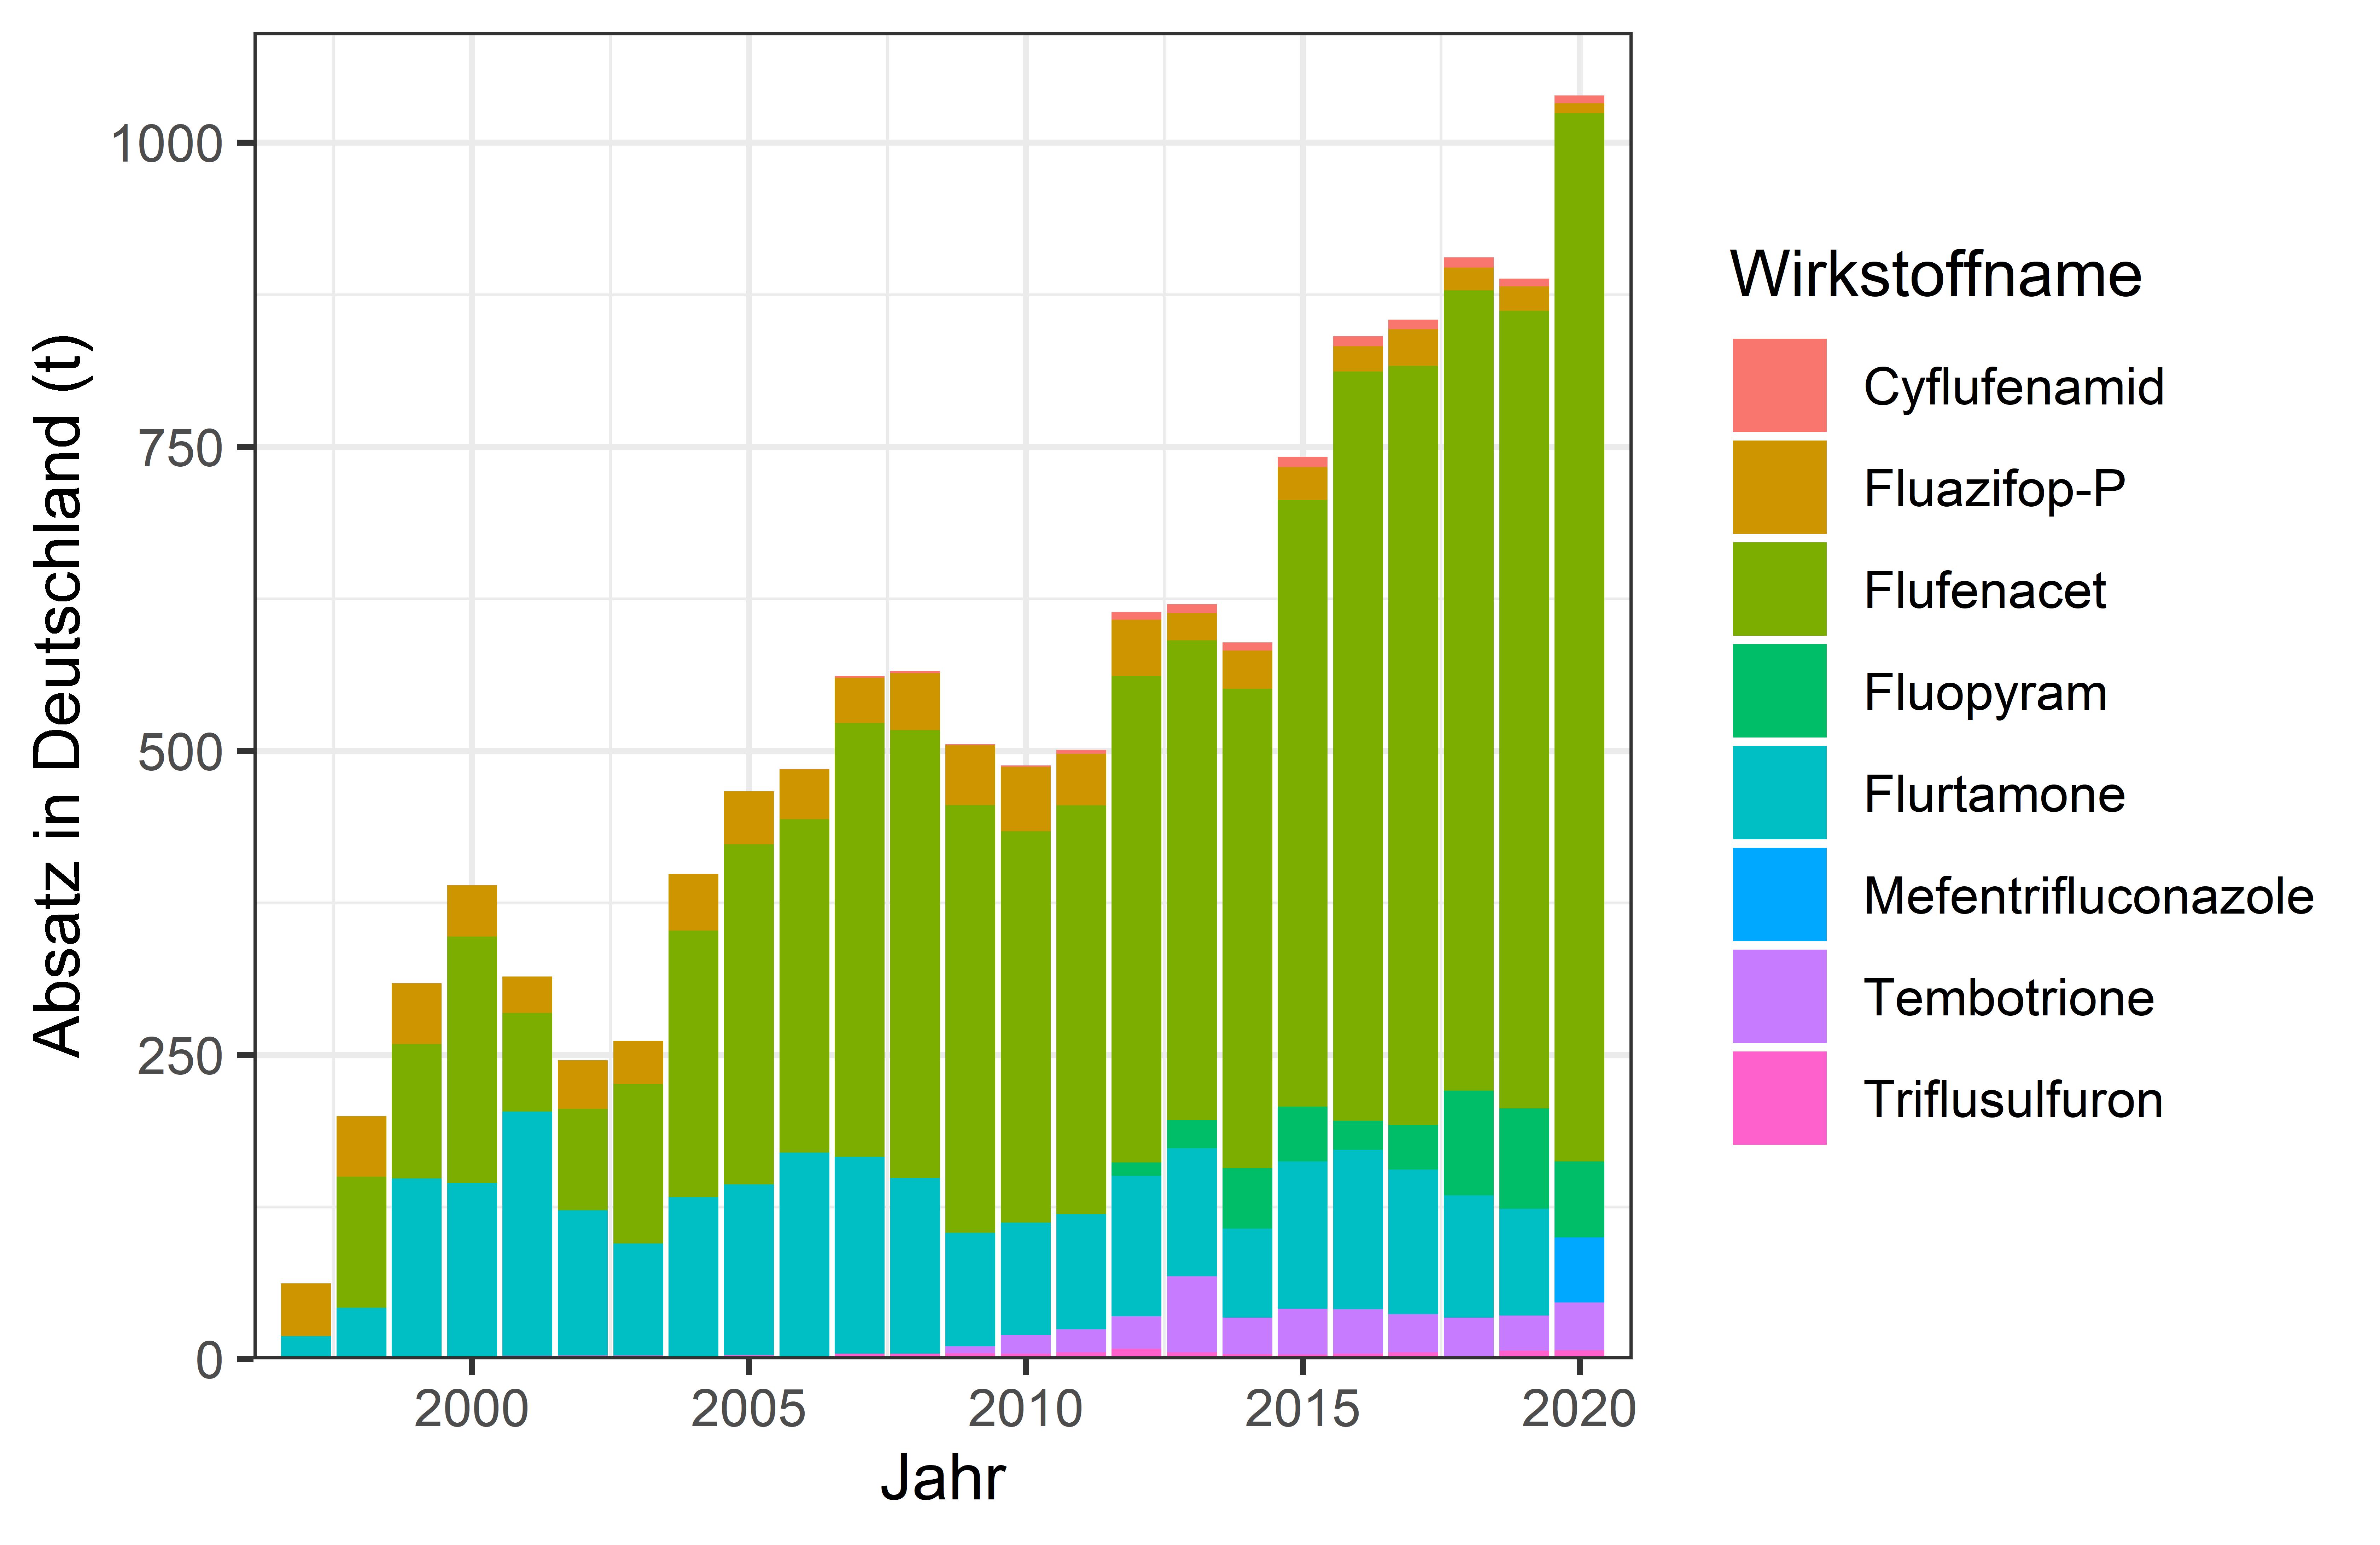


Suppl. Abbildung 1: Absatz von mengenmäßig relevanten Herbiziden und Fungiziden mit mindestens einer CF3-Gruppe.
Quelle: Absatzzahlen aus <https://www.bvl.bund.de/DE/Arbeitsbereiche/04_Pflanzenschutzmittel/01_Aufgaben/02_ZulassungPSM/03_PSMInlandsabsatzAusfuhr/psm_PSMInlandsabsatzAusfuhr_node.html> (letzter Zugriff 15.06.2022)
